# Supplementary material for: Effects of Substitution, and Adding of Carbohydrate and Fat to Whey-Protein on Energy Intake, Appetite, Gastric Emptying, Glucose, Insulin, Ghrelin, CCK and GLP-1 in Healthy Older Men—A Randomized Controlled Trial
Source: MDPI journal article supplement (doi:10.3390/nu10020113), 2018-01-23
Supplement: s1 [file s1]

**Supplementary Table S1.** Glucose, insulin, ghrelin, CCK and GLP-1 after drink ingestion in healthy older men.

| Glucose and gut hormones | Control                 | P <sub>280</sub>          | M <sub>280</sub>         | M <sub>504</sub>        |
|--------------------------|-------------------------|---------------------------|--------------------------|-------------------------|
| Peak/nadir concentration |                         |                           |                          |                         |
| Glucose                  | 5.9 ± 0.1 <sup>a</sup>  | 6.1 ± 0.1 <sup>a,b</sup>  | 7.4 ± 0.3 <sup>b</sup>   | 7.2 ± 0.3 <sup>b</sup>  |
| Insulin                  | 7 ± 3 <sup>a</sup>      | 39 ± 17 <sup>a,b</sup>    | 56 ± 18 <sup>a,b</sup>   | 67 ± 18 <sup>b</sup>    |
| Ghrelin                  | 2171 ± 240 <sup>a</sup> | 1855 ± 183 <sup>a</sup>   | 2194 ± 251 <sup>b</sup>  | 1862 ± 198 <sup>b</sup> |
| CCK                      | 2.7 ± 0.2 <sup>a</sup>  | 3.9 ± 0.3 <sup>b</sup>    | 3.1 ± 0.3 <sup>a,b</sup> | 3.9 ± 0.3 <sup>b</sup>  |
| GLP-1                    | 19 ± 1 <sup>a</sup>     | 39 ± 3 <sup>b</sup>       | 25 ± 2 <sup>a</sup>      | 36 ± 3 <sup>b</sup>     |
| Time to peak/nadir       |                         |                           |                          |                         |
| Glucose                  | 42 ± 13                 | 20 ± 5                    | 29 ± 3                   | 22 ± 2                  |
| Insulin                  | 15 ± 3 <sup>a</sup>     | 53 ± 7 <sup>b</sup>       | 39 ± 3 <sup>b</sup>      | 44 ± 7 <sup>b</sup>     |
| Ghrelin                  | 44 ± 13 <sup>a</sup>    | 126 ± 14 <sup>b</sup>     | 58 ± 7 <sup>a</sup>      | 114 ± 18 <sup>b</sup>   |
| CCK                      | 39 ± 15 <sup>a</sup>    | 87 ± 16 <sup>a,b</sup>    | 45 ± 12 <sup>a,b</sup>   | 99 ± 16 <sup>b</sup>    |
| GLP-1                    | 87 ± 22 <sup>a</sup>    | 138 ± 13 <sup>a,b</sup>   | 98 ± 18 <sup>a,b</sup>   | 155 ± 7 <sup>b</sup>    |
| 180-min concentration    |                         |                           |                          |                         |
| Glucose                  | 5.5 ± 0.1 <sup>a</sup>  | 5.3 ± 0.4 <sup>a</sup>    | 4.9 ± 0.4 <sup>b</sup>   | 5.5 ± 0.4 <sup>a</sup>  |
| Insulin                  | 3.9 ± 1.9               | 21 ± 13                   | 3.8 ± 1.6                | 32 ± 9                  |
| Ghrelin                  | 2069 ± 257 <sup>a</sup> | 1302 ± 137 <sup>a,b</sup> | 2091 ± 259 <sup>a</sup>  | 1254 ± 117 <sup>b</sup> |
| CCK                      | 1.8 ± 0.1 <sup>a</sup>  | 3.0 ± 0.2 <sup>b</sup>    | 1.9 ± 0.2 <sup>a</sup>   | 3.0 ± 0.3 <sup>b</sup>  |
| GLP-1                    | 16 ± 1 <sup>a</sup>     | 35 ± 2 <sup>b</sup>       | 21 ± 2 <sup>a</sup>      | 33 ± 3 <sup>b</sup>     |

Mean (± SEM) peak/nadir concentrations, time to peak/nadir (min) and 180-min concentrations of blood glucose and plasma insulin, ghrelin, CCK and GLP-1 in healthy older men (*n* = 13), after drinks containing either: (i) 70 g whey protein (280 kcal; 'P<sub>280</sub>'), (ii) 14 g protein, 28g carbohydrate, 12.4 g fat (280 kcal; 'M<sub>280</sub>'), (iii) 70 g protein, 28 g carbohydrate, 12.4 g fat (504 kcal; 'M<sub>504</sub>'), or (iv) an iso-palatable control drink (~2 kcal; 'control'). <sup>a,b,c,d</sup> *p* < 0.05, post hoc test: different letter indicates significant difference between drink-conditions: control vs. P<sub>280</sub> vs. M<sub>280</sub> vs. M<sub>504</sub>.

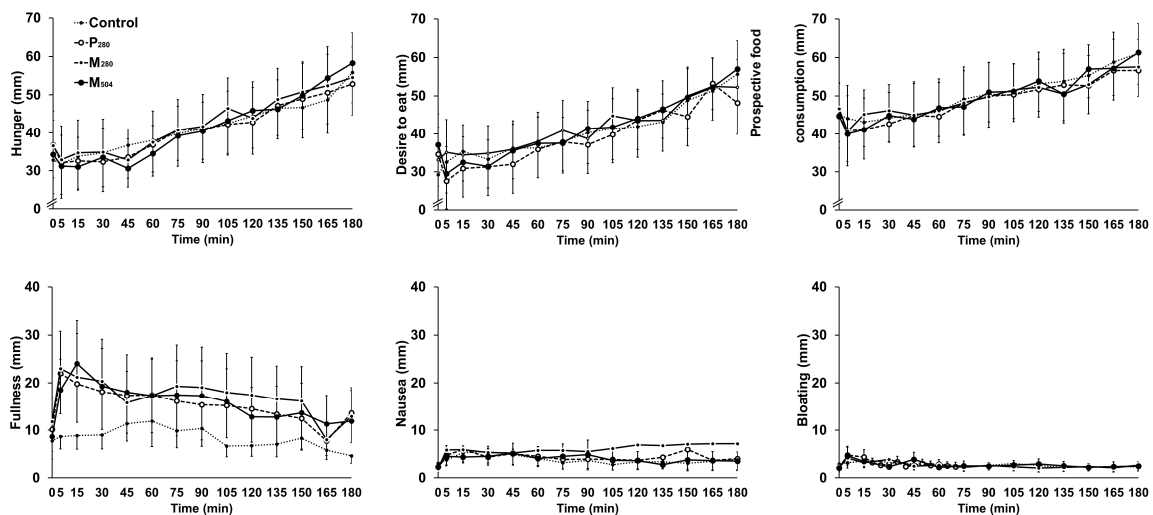

**Supplementary Figure S1.** Mean (± SEM) visual analogue score (VAS, mm) of hunger, desire to eat, prospective food consumption, fullness, nausea and bloating in healthy older men (*n* = 13), after drinks containing either: (i) 70 g whey protein (280 kcal; 'P<sub>280</sub>'; dashed line with open circles), (ii) 14 g protein, 28 g carbohydrate, 12.4 g fat (280 kcal; 'M<sub>280</sub>'; solid line with open circles), (iii) 70 g protein, 28 g carbohydrate, 12.4 g fat (504 kcal; 'M<sub>504</sub>'; solid line with closed circles), or (iv) an iso-palatable control drink (~2 kcal; 'control'; dotted line).

Effects of time were significant for hunger ( $p < 0.001$ ), desire to eat ( $p < 0.001$ ), prospective food consumption ( $p < 0.001$ ) and fullness ( $p = 0.001$ ).
